# Supplementary material for: Unveiling the fundamental understanding of two dimensional π-conjugated FeN4+4 sites for boosting peroxymonosulfate activation
Source: Royal Society of Chemistry journal article supplement (doi:10.1039/d4ta01195c), 2024-01-01
Supplement: d4ta01195c1.pdf [file d4ta01195c1.pdf]

1

## Supplementary Information for

2

### 3 **Unveil the fundamental understanding of two dimensional $\pi$ -** 4 **conjugated FeN<sub>4+4</sub> sites for boosting peroxymonosulfate** 5 **activation**

6 *Sijia Jin<sup>a</sup>, Wenxian Tan<sup>a</sup>, Xiaofeng Tang<sup>a</sup>, Xia Yao<sup>a</sup>, Yingjian Bao<sup>a</sup>, Haiyan Zhang<sup>a,b</sup>,*

7 *Shuang Song<sup>a</sup>, Tao Zeng<sup>\*ac</sup>*

8

9 <sup>a</sup> Key Laboratory of Microbial Technology for Industrial Pollution Control of Zhejiang  
10 Province, College of Environment, Zhejiang University of Technology, Hangzhou,  
11 Zhejiang 310032, P. R. China

12 <sup>b</sup> Hangzhou Institute for Advanced Study, University of Chinese Academy of Sciences,  
13 Hangzhou, Zhejiang, 310024, P.R. China

14 <sup>c</sup> Shaoxing Research Institute, Zhejiang University of Technology, Shaoxing, Zhejiang,  
15 312000, PR China

16 **\* Corresponding Author**

17 Tao Zeng.

18 Email: zengtao@zjut.edu.cn; Tel: +86-571-88320726.

## 19 **Text S1. Chemicals and Reagents**

20 Potassium monopersulfate triple salt (PMS, Oxone<sup>®</sup>, 2KHSO<sub>5</sub>·KHSO<sub>4</sub>·K<sub>2</sub>SO<sub>4</sub>), 5,5-  
21 dimethyl-1-pyrroline-N-oxide (DMPO), and 2,2,6,6-tetramethylpiperidinyloxy  
22 (TEMP) were purchased from Sigma-Aldrich Chemical Co., Ltd. 1,2,4,5-  
23 tetracyanobenzene (BTC), ethylene glycol, N,N-dimethylformamide(DMF), 2,2'-  
24 azino-bis(3-ethylbenzothiazoline-6-sulfonic acid) diammonium salt (ABTS) were  
25 purchased from Shanghai Macklin Biochemical Co., Ltd. Ferric chloride (FeCl<sub>3</sub>), cobalt  
26 chloride(CoCl<sub>2</sub>), nickel chloride(NiCl<sub>2</sub>), copper chloride(CuCl<sub>2</sub>), 1,2-dicyanobenzene,  
27 potassium thiocyanate (KSCN), bisphenol A (BPA), nitroblue tetrazolium chloride  
28 (NBT) and sodium azide (NaN<sub>3</sub>) were supplied by Aladdin Industrial Corporation.  
29 Potassium Iodide (KI), 1,8-diazabicyclo[5.4.0]undec-7-ene (DBU), 1,4-benzoquinone  
30 (BQ), L-Histidine (L-His) were obtained from J&K Chemical Co., Ltd. Tert-butanol  
31 (TBA), methanol (MeOH), ethanol (EtOH), hydrochloric acid (HCl) and dimethyl  
32 sulfoxide (DMSO) were obtained from Sinopharm Chemical Reagent Co., Ltd. All  
33 chemicals used in this study were at least in analytical grade without any further  
34 purification.

## 35 **Text S2. Synthesis of CPF-MN<sub>4+4</sub> (M= Co, Ni, Cu)**

36 Synthesis of CPF-CoN<sub>4+4</sub>: Similar to the experimental section of CPF-FeN<sub>4+4</sub>, CPF-  
37 CoN<sub>4+4</sub> was synthesized by treating cobalt chloride (0.130 g, 1 mmol) with 120 mL of  
38 mixed solution.

39 Synthesis of CPF-NiN<sub>4+4</sub>: Similar to the experimental section of CPF-FeN<sub>4+4</sub>, CPF-  
40 NiN<sub>4+4</sub> was synthesized by treating nickel chloride (0.129 g, 1 mmol) with 120 mL of  
41 mixed solution.

42 Synthesis of CPF-CuN<sub>4+4</sub>: Similar to the experimental section of CPF-FeN<sub>4+4</sub>, CPF-  
43 CuN<sub>4+4</sub> was synthesized by treating copper chloride (0.134 g, 1 mmol) with 120 mL of  
44 mixed solution.

### 45 **Text S3. Characterization**

46 The chemical states of different elements of CPF-MN<sub>4+4</sub>, CPF, and mono-FeN<sub>4+4</sub> was  
47 detected by X-ray photoelectron spectroscopy (XPS, ESCALAB 250Xi, USA), X-ray  
48 diffraction (XRD) patterns were recorded with a PANalytical Empyrean powder  
49 diffractometer using Cu K $\alpha$  radiation ( $\lambda$ = 0.1541 nm). Fourier transform infrared  
50 (FTIR) spectroscopy was obtained on Thermo Scientific Nicolet iS20 FTIR  
51 spectrometer with KBr as the diluents. X-ray photoelectron spectroscopy (XPS) data  
52 were obtained on PerkinElmer PHI 5000 C instrument with a monochromatized Al K $\alpha$   
53 line source (200 W). The morphology of samples was observed through a field emission  
54 scanning electron microscope (FE-SEM, HITACHI Regulus 8100). High-resolution  
55 transmission electron microscopy (HRTEM) images were obtained in FEI TalosF200S  
56 equipment. The contents of Fe in the samples were quantified by an inductively coupled  
57 plasma optical emission spectrometer (ICP-OES, Agilent 720ES). The high-angle  
58 annular dark-field scanning transmission electron microscopy (HAADF STEM) images  
59 were achieved by FEI Titan Themis 60-300 TEM/STEM. The X-ray absorption fine  
60 structure spectra (Fe K-edge) were collected at beamline BL44B2 at the SPring-8

61 synchrotron in Japan. The storage rings of SPring-8 was operated at 8.0 GeV with a  
62 maximum current of 250 mA. Using Si (111) double-crystal monochromator, the data  
63 collection were carried out in transmission mode using ionization chamber. All spectra  
64 were collected in ambient conditions. The electron paramagnetic resonance (EPR)  
65 measurements were carried out on a Bruker Model A300 spectrometer.

#### 66 **Text S4. Analytical Methods.**

67 Analysis of BPA concentration was conducted using a Waters e2695 High Performance  
68 Liquid Chromatography (HPLC) system, equipped with a UV detector and a C18  
69 column of 4.6 mm × 150 mm and 5 μm particle size. Detection wavelengths were set  
70 as 225 nm, 270 nm and 224 nm for BPA, phone and ATZ, respectively, with a mobile  
71 phase of methanol/water (70:30, v/v). Further, a mobile phase of methanol/water  
72 (60:40, v/v) was set at 280 nm for 4-chlorophenol (4-CP).

73 The contaminant degradation efficiency ( $\eta$ ) is evaluated as Eq. (S1).

$$\eta = \frac{C_0 - C_t}{C_0} \times 100\% \quad (\text{S1})$$

74 Where  $C_0$  and  $C_t$  are corresponded to the contaminant concentration at initial time and  
75 time  $t$  (min), respectively.

76 Total Organic Carbon (TOC) content was determined with a Shimadzu TOC-L  
77 Analyzer. Liquid chromatography/mass spectrometry (LC/MS) spectrometry were  
78 carried out using an Agilent 1290 (Agilent, USA) liquid chromatograph equipped with  
79 a Agilent qtof6550 (Agilent, USA) tandem mass spectrometer. Electrochemical  
80 impedance spectroscopy (EIS) and chronoamperometry properties were also evaluated

81 in a conventional three-electrode cell, with a Pt plate as counter electrode, an Ag/AgCl  
82 electrode as reference electrode and an Indium-tin oxide (ITO) glass substrate as  
83 working electrode. To prepare the working electrode, a slurry of 20 mg sample  
84 dispersed in 300  $\mu\text{L}$  of isopropanol and 50  $\mu\text{L}$  Nafion was sonicated and spread onto  
85 pretreated ITO glass. After air-drying, the Scotch tape was unstuck, and the uncoated  
86 part was isolated with epoxy resin. PMS concentration was measured using the 2,2'-  
87 azino-bis (3-ethylbenzothiazoline-6-sulfonic acid) diammonium salt (ABTS) method.  
88 In brief, 0.1 mL of sample was added to a mixture of 0.5 mL of 2 mM ABTS solution,  
89 1 mL of acetate buffer solution ( $\text{pH} = 4$ ), and 20  $\mu\text{L}$  of 1.5 mM potassium iodide (KI)  
90 solution, and diluted to 3 mL with water. An absorbance of 415 nm with an absorption  
91 coefficient of  $34\,000\ \text{M}^{-1}\ \text{cm}^{-1}$  was detected for each PMS mole, which produced two  
92 moles of  $\text{ABTS}^{+\cdot}$ .

### 93 **Text S5. DFT computational methods**

94 DFT calculations were conducted using the Vienna Ab-initio Simulation Package  
95 (VASP), with the exchange-correlation effects described by the Perdew-Burke-  
96 Ernzerhof (PBE) functional within the generalized gradient approximation (GGA)  
97 method and core-valence interactions accounted for by the projected augmented wave  
98 (PAW) method. The energy cutoff for plane wave expansions was set to 450 eV, with  
99 structural optimization completed for energy and force convergence set at  $1.0 \times 10^{-5}$  eV  
100 and  $0.02\ \text{eV}\ \text{\AA}^{-1}$ , respectively. The Brillouin zone was sampled using a  $2 \times 2 \times 1$  grid  
101 centered at the gamma ( $\Gamma$ ) point, while Grimme's DFT-D3 methodology was employed  
102 to account for dispersion interactions. The Gibbs free energy changes ( $\Delta G$ ) of the

103 reaction were then calculated as  $\Delta G = \Delta E + \Delta ZPE - T\Delta S$ , wherein  $\Delta E$  is the electronic  
104 energy difference directly obtained from DFT calculations,  $\Delta ZPE$  is the zero-point  
105 energy difference,  $T$  is the room temperature (298.15 K) and  $\Delta S$  is the entropy change.<sup>1</sup>  
106 <sup>2</sup>

107 **Text S6. The calculation of normalized  $k_{obs}$  ( $K_N$ )**

108 The calculation of  $K_N$  (normalized  $k_{obs}$ ,  $\text{min}^{-1} \text{L}^2 \text{g}^{-2}$ ):

109 
$$K_N = \frac{k_{obs}}{[PMS] \times [Cat.]}$$

110 where  $k_{obs}$  is the observed reaction rate constant ( $\text{min}^{-1}$ ),  $[PMS]$  and  $[Cat.]$  are the dose  
111 of the catalyst ( $\text{g L}^{-1}$ ) and PMS ( $\text{g L}^{-1}$ ), respectively

112 **Table S1.** EXAFS fitting parameters at the Fe K-edge for various samples

| Sample                         | Shell               | $CN^a$  | $R(\text{\AA})^b$ | $\sigma^2 (\text{\AA}^2 \cdot 10^{-3})^c$ | $\Delta E_0(\text{eV})^d$ | R factor (%) |
|--------------------------------|---------------------|---------|-------------------|-------------------------------------------|---------------------------|--------------|
| Fe Foil                        | Fe-Fe <sub>1</sub>  | 8*      | 2.46±0.006        | 0.0049                                    | 4.51±1.12                 | 0.6          |
|                                | Fe-Fe <sub>2</sub>  | 6*      | 2.83±0.014        | 0.0061                                    | 6.90±2.12                 |              |
| Fe <sub>2</sub> O <sub>3</sub> | Fe-O <sub>1</sub> * | 3*      | 1.93±0.007        | 0.0069                                    | 3.52±0.23                 | 1.1          |
|                                | Fe-O <sub>2</sub> * | 3*      | 2.07±0.020        | 0.0040                                    | 5.17±1.15                 |              |
| Fe Pc                          | Fe-N                | 4*      | 1.93±0.021        | 0.0047                                    | 3.64±1.22                 | 0.7          |
| FeO                            | Fe-O*               | 6*      | 2.14±0.023        | 0.0050                                    | 0.85±3.20                 | 0.7          |
| CPF-FeN <sub>4+4</sub>         | Fe-N                | 3.9±0.2 | 1.92±0.011        | 0.0058                                    | 6.71±2.07                 | 0.6          |

113 <sup>a</sup> $CN$ , coordination number; <sup>b</sup> $R$ , distance between absorber and backscatter atoms; <sup>c</sup> $\sigma^2$ , Debye-  
114 Waller factor to account for both thermal and structural disorders; <sup>d</sup> $\Delta E_0$ , inner potential correction;  
115  $R$  factor indicates the goodness of the fit.  $S_0^2$  was fixed to 0.78, according to the experimental  
116 EXAFS fit of Fe foil by fixing CN as the known crystallographic value. Fitting range:  $3.0 \leq k (\text{\AA}^{-1})$   
117  $\leq 12$  and  $1.5 \leq R (\text{\AA}) \leq \sim 3.2$  (Fe foil);  $3.0 \leq k (\text{\AA}^{-1}) \leq 12.0$  and  $1.0 \leq R (\text{\AA}) \leq \sim 2.2$  (Sample Fe). A  
118 reasonable range of EXAFS fitting parameters:  $0.700 < S_0^2 < 1.000$ ;  $CN > 0$ ;  $\sigma^2 > 0 \text{\AA}^2$ ;  $\Delta E_0 < 10$   
119 eV;  $R$  factor  $< 0.02$ .

120 **Table S2.** Kinetics comparison of micropollutants degradation of by CPF-FeN<sub>4+4</sub>/PMS

121 and other single-atom catalyst/PMS systems.

| Catalysts                        | PMS dosage (g/L) | Catalyst dosage (g/L) | Contaminant ( $\mu\text{M}$ ) | $k_{\text{obs}}$ | $K_N$  | Ref.      |
|----------------------------------|------------------|-----------------------|-------------------------------|------------------|--------|-----------|
| Co-C-600                         | 0.25             | 0.1                   | SMX (40 $\mu\text{M}$ )       | 0.071            | 2.84   | 3         |
| FeSA-N-CNT                       | 0.25             | 0.02                  | BPA (50 $\mu\text{M}$ )       | 0.102            | 20.40  | 4         |
| Co-N-CNTs                        | 0.6              | 0.1                   | SMX (40 $\mu\text{M}$ )       | 0.175            | 1.05   | 5         |
| NiSACs@CN                        | 0.4              | 0.05                  | SMX (40 $\mu\text{M}$ )       | 0.129            | 6.45   | 6         |
| Co-SA                            | 0.3              | 0.2                   | CIP (60 $\mu\text{M}$ )       | 0.140            | 2.33   | 7         |
| 1.2Fe-N-C                        | 0.2              | 0.15                  | Phenol (200 $\mu\text{M}$ )   | 0.328            | 10.93  | 8         |
| SA Cu/Graphene                   | 0.8              | 0.1                   | SMX (40 $\mu\text{M}$ )       | 0.088            | 1.10   | 9         |
| Fe <sub>SA</sub> -BC             | 0.6              | 0.2                   | BPA (40 $\mu\text{M}$ )       | 0.158            | 1.32   | 10        |
| SA Fe-OCN                        | 0.6              | 0.5                   | Phenol (100 $\mu\text{M}$ )   | 0.039            | 0.13   | 11        |
| Cu-N <sub>4</sub> /C-B           | 0.2              | 0.1                   | BPA (88 $\mu\text{M}$ )       | 0.56             | 28.00  | 12        |
| Co-CN                            | 0.031            | 0.03                  | Phenol (200 $\mu\text{M}$ )   | 0.014            | 15.05  | 13        |
| CoSAC-NG                         | 0.6              | 0.005                 | BPA (20 $\mu\text{M}$ )       | 0.044            | 14.66  | 14        |
| Co-N <sub>3</sub> O <sub>1</sub> | 0.307            | 0.1                   | CIP (15 $\mu\text{M}$ )       | 0.287            | 9.35   | 15        |
| CPF-FeN <sub>4+4</sub>           | 0.1              | 0.1                   | BPA (20 $\mu\text{M}$ )       | 1.87             | 187.00 | This work |



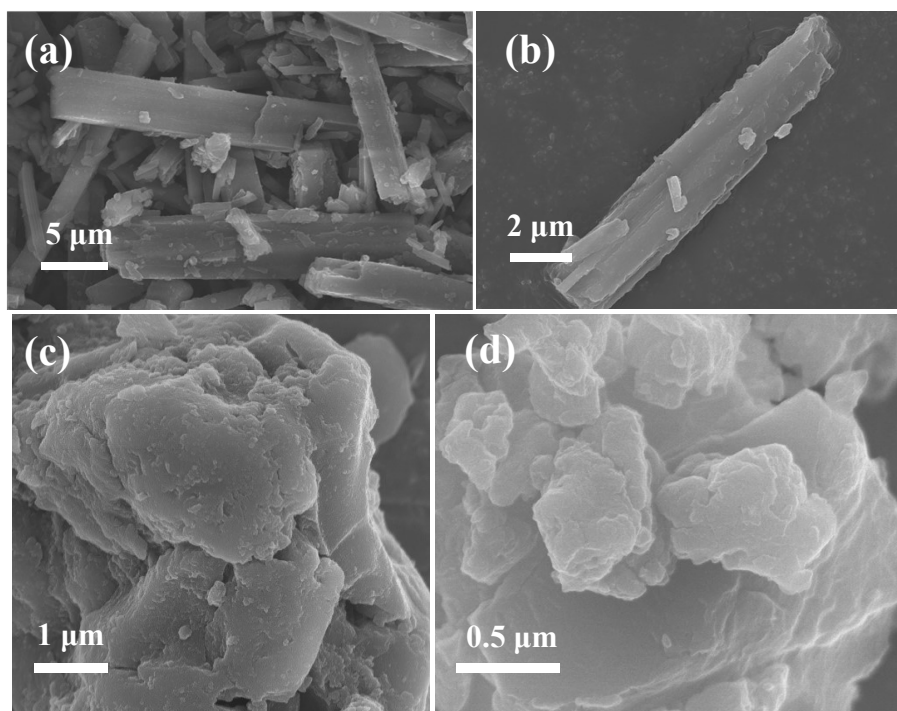

123

124 **Figure S1.** FE-SEM image of (a-b) mono-FeN<sub>4+4</sub> and (c-d) CPF-FeN<sub>4+4</sub>

125

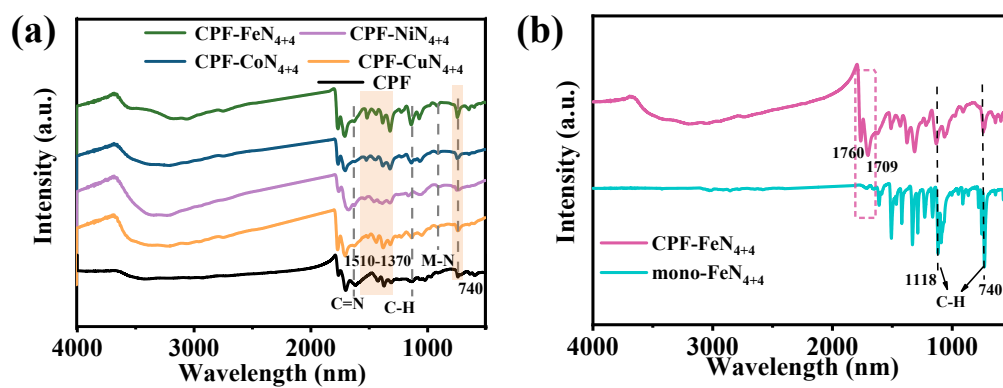

126

127 **Figure S2.** FTIR spectra of (a) CPF, CPF-MN<sub>4+4</sub> (M=Fe, Co, Ni, Cu), (b) CPF-FeN<sub>4+4</sub>,

128 and mono-FeN<sub>4+4</sub>.

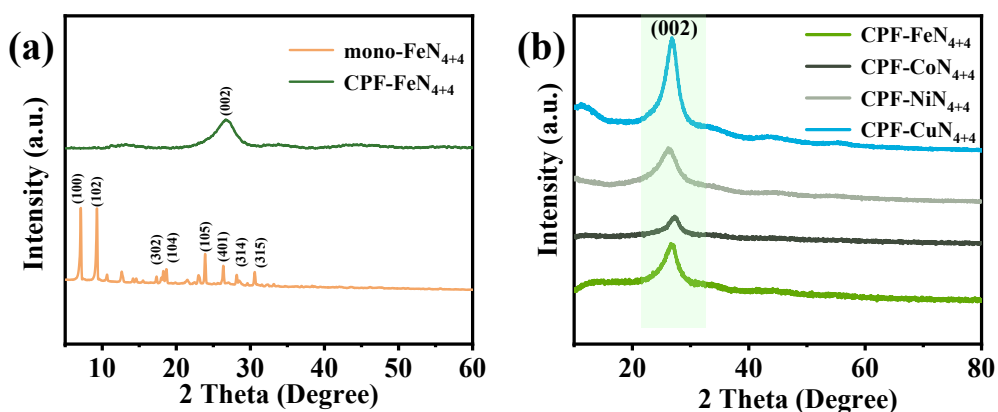

129

130 **Figure S3.** (a) XRD spectra of CPF- FeN<sub>4+4</sub>, mono-FeN<sub>4+4</sub> and (b) CPF-MN<sub>4+4</sub> (M=Fe,  
 131 Co, Ni, Cu).

132

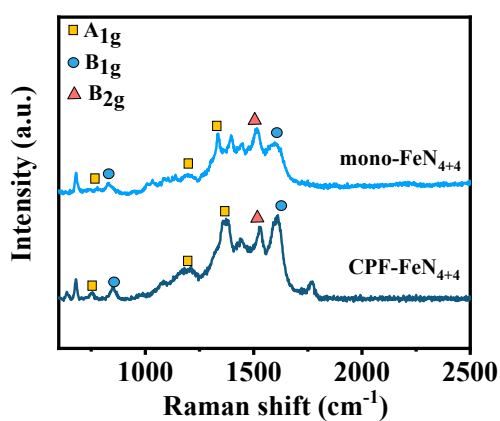

133

134 **Figure S4** Raman spectra of CPF-FeN<sub>4+4</sub>, and mono-FeN<sub>4+4</sub>.

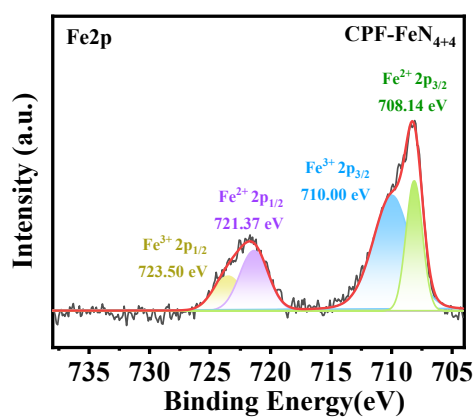

135

136 **Figure S5.** XPS Fe 2p spectra of CPF-FeN<sub>4+4</sub>.

137

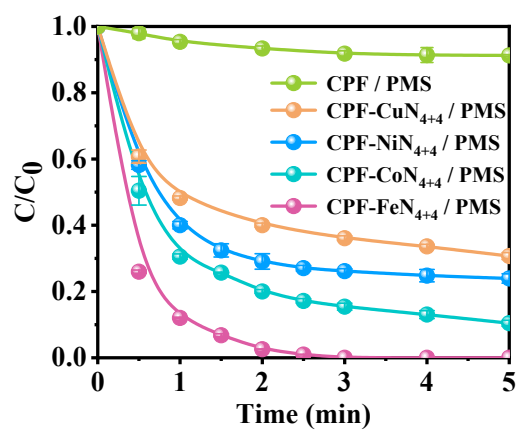

138

139 **Figure S6.** The different metal catalyst systems of BPA degradation.

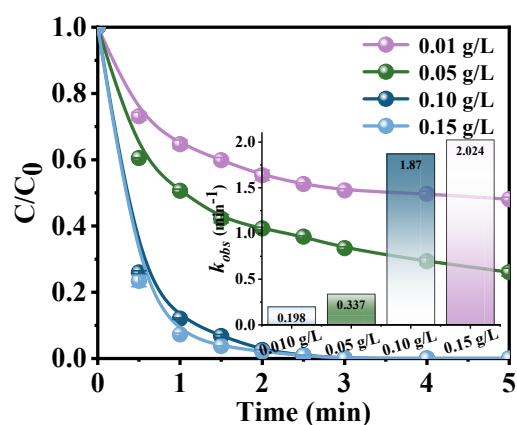

140

141 **Figure S7** The effect of catalyst dosage on the removal of BPA in CPF-FeN<sub>4+4</sub>/PMS  
 142 system. Routine conditions: [BPA] = 20  $\mu\text{M}$ , [PMS] = 0.15 mM, temperature = 25  $^{\circ}\text{C}$ ,  
 143 without pH adjustment.

144

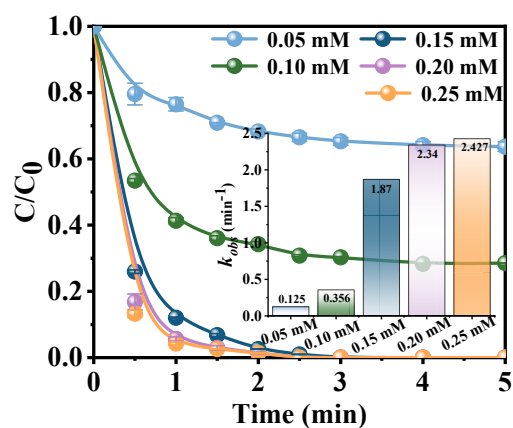

145

146 **Figure S8.** The effect of PMS dosage on the removal of BPA in CPF-FeN<sub>4+4</sub>/PMS  
 147 system. Routine conditions: [BPA] = 20  $\mu\text{M}$ , [catalyst] = 0.10 g/L, temperature = 25  
 148  $^{\circ}\text{C}$ , without pH adjustment.

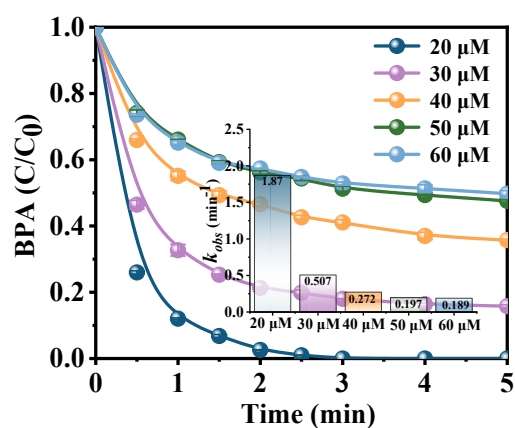

149

150 **Figure S9.** The effect of BPA concentration on the removal of BPA in CPF-  
 151 FeN<sub>4+4</sub>/PMS system. Routine conditions: [catalyst] = 0.10 g/L, [PMS] = 0.15 mM,  
 152 temperature = 25 °C, without pH adjustment.

153

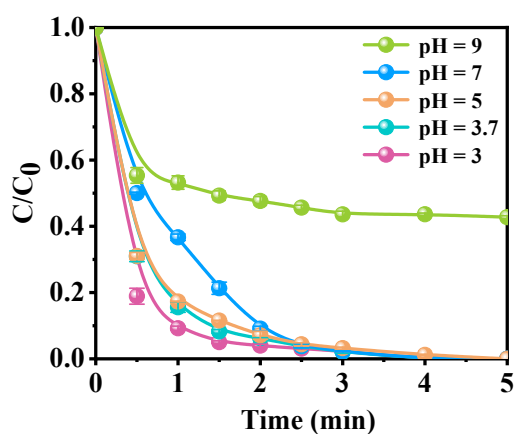

154

155 **Figure S10.** The effect of pH on the removal of BPA in CPF-FeN<sub>4+4</sub>/PMS system.  
 156 Routine conditions: [BPA] = 20 μM, [catalyst] = 0.10 g/L, [PMS] = 0.15 mM,  
 157 temperature = 25 °C.

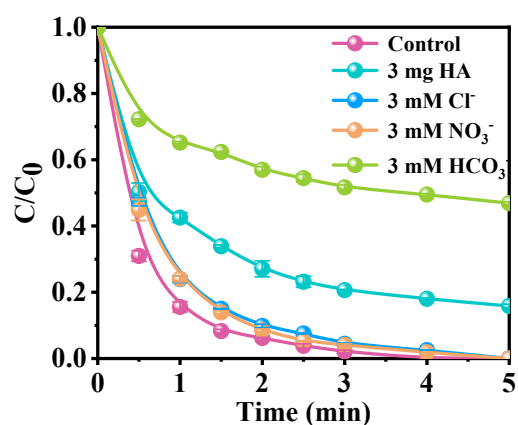

158

159 **Figure S11.** The effects of inorganic anions ( $\text{HCO}_3^-$ ,  $\text{NO}_3^-$  and  $\text{Cl}^-$ ) and HA on the  
 160 removal of BPA in CPF- $\text{FeN}_{4+4}$ /PMS system. Routine conditions:  $[\text{BPA}] = 20 \mu\text{M}$ ,  
 161  $[\text{catalyst}] = 0.10 \text{ g/L}$ ,  $[\text{PMS}] = 0.15 \text{ mM}$ , temperature =  $25 \text{ }^\circ\text{C}$ , without pH adjustment.

162

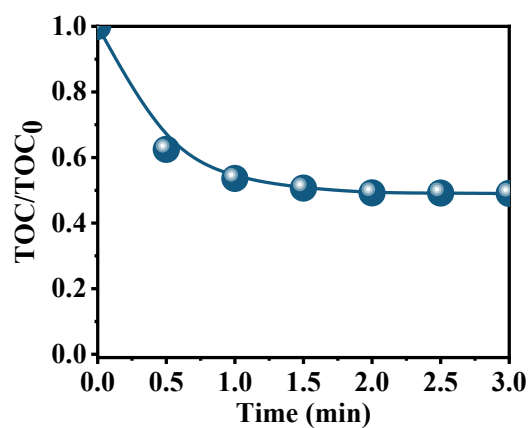

163

164 **Figure S12.** TOC removal of BPA in CPF- $\text{FeN}_{4+4}$ /PMS system.

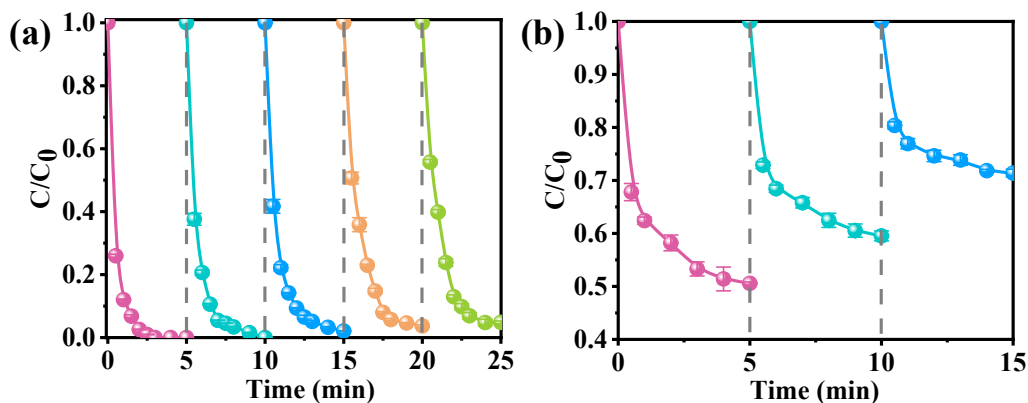

165

166 **Figure S13.** Recyclability of (a) CPF- $\text{FeN}_{4+4}$ /PMS system and (b) mono- $\text{FeN}_{4+4}$ /PMS  
 167 system for BPA removal. Routine conditions: [BPA] = 20  $\mu\text{M}$ , [catalyst] = 0.10 g/L,  
 168 [PMS] = 0.15 mM, temperature = 25  $^\circ\text{C}$ , without pH adjustment.

169

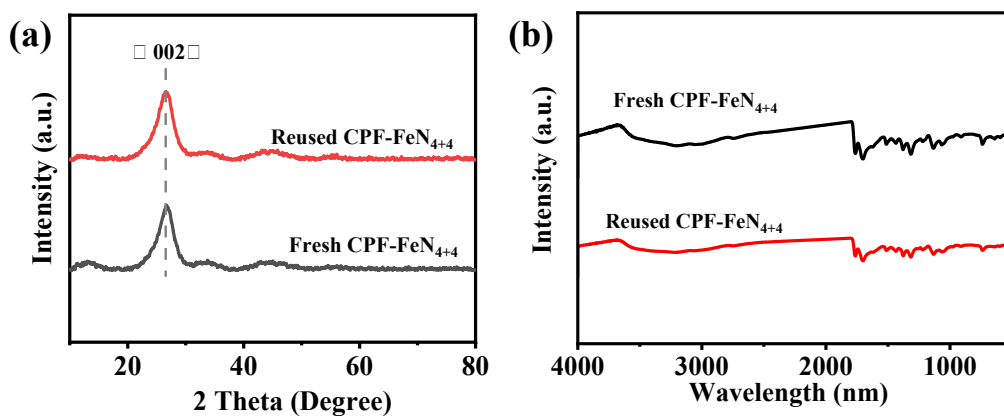

170

171 **Figure S14.** (a) XRD patterns of fresh and reused CPF- $\text{FeN}_{4+4}$ . (b) FTIR spectra of  
 172 fresh and reused CPF- $\text{FeN}_{4+4}$ .

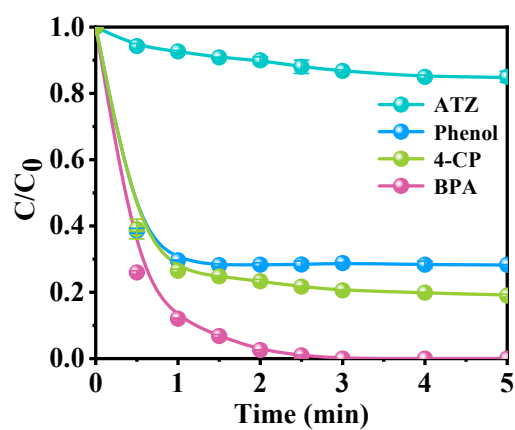

173

174 **Figure S15.** Different pollutants removal in CPF-FeN<sub>4+4</sub>/PMS system.

175

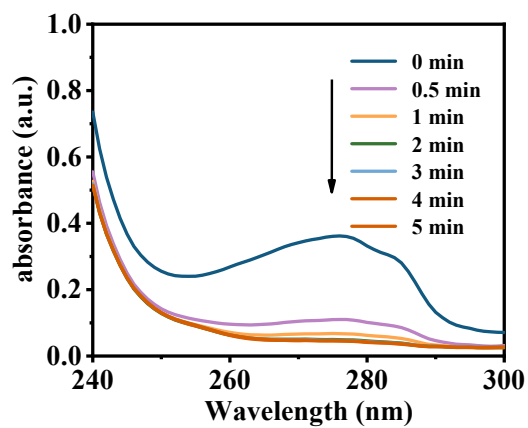

176

177 **Figure S16.** Spectra of NBT transformation generated by CPF-FeN<sub>4+4</sub>/PMS system.



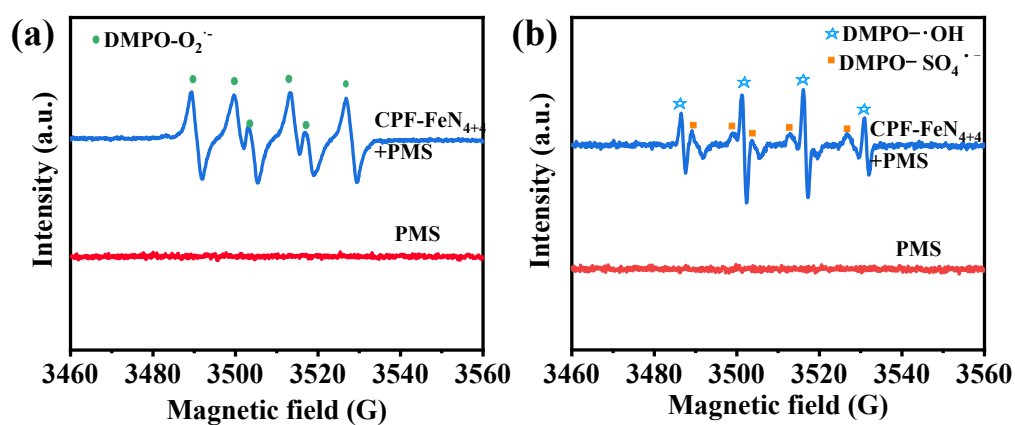

178

179 **Figure S17.** (a) EPR spectra of different systems using DMPO in MeOH as the spin-  
 180 trapping agent. (b) EPR spectra of different systems using DMPO in H<sub>2</sub>O as the spin-  
 181 trapping agent.

182

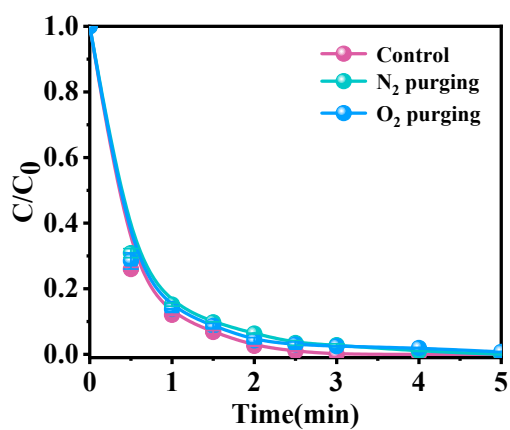

183

184 **Figure S18.** Effect of N<sub>2</sub> and O<sub>2</sub> purging in CPF-FeN<sub>4+4</sub>/PMS system on BPA removal.

185

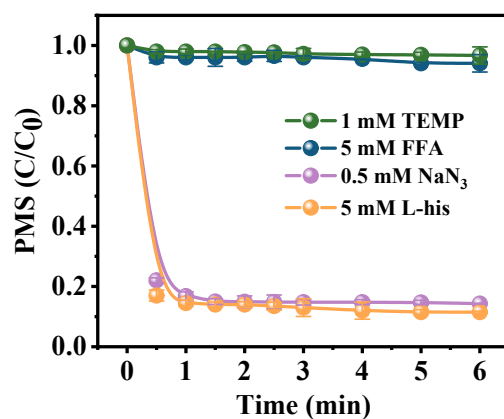

186

187 **Figure S19.** Decomposition rate of PMS with different quenchers. Routine conditions:  
 188 [PMS] = 0.15 mM, temperature = 25 °C, without pH adjustment.

189

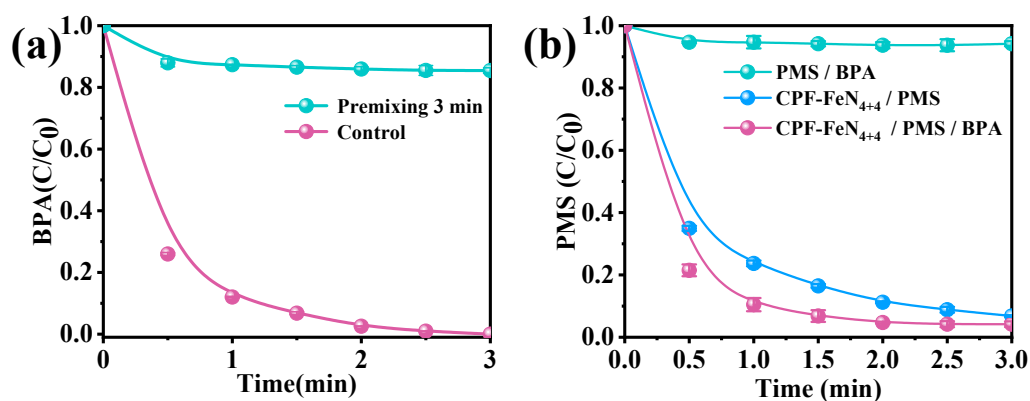

190

191 **Figure S20.** (a) Effect of premixing in CPF-FeN<sub>4+4</sub>/PMS system on BPA removal. (b)  
 192 Decomposition rate of PMS in different systems. Routine conditions: [BPA] = 20 μM,  
 193 [catalyst] = 0.10 g/L, [PMS] = 0.15 mM, temperature = 25 °C, without pH adjustment.

194

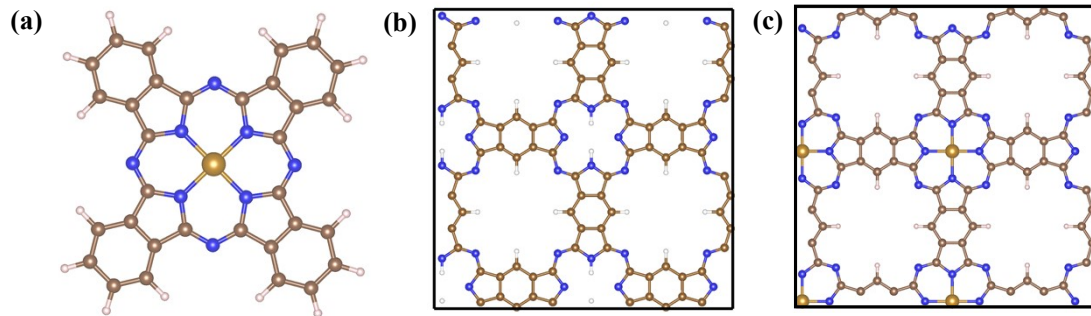

195

196 **Figure S21.** Top view structures of (a) mono-FeN<sub>4+4</sub>, (b) CPF and (c) CPF-FeN<sub>4+4</sub>

197 models.

198

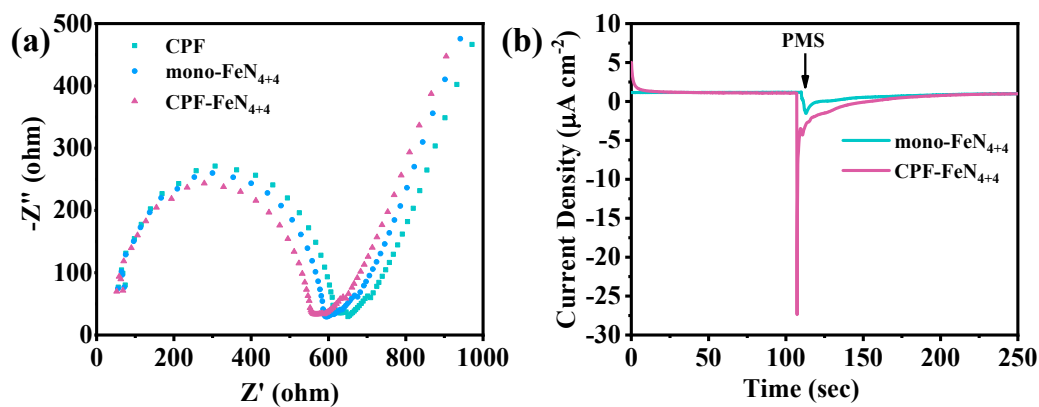

199

200 **Figure S22.** (a) electrochemical impedance analyses spectra of CPF-FeN<sub>4+4</sub>, mono-

201 FeN<sub>4+4</sub> and CPF. (b)The I-t curves of CPF-FeN<sub>4+4</sub> and mono-FeN<sub>4+4</sub>.

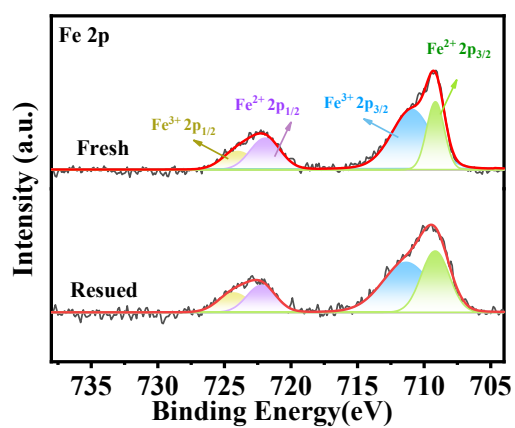

202

203 **Figure S23.** XPS Fe 2p spectra of fresh and reused CPF-FeN<sub>4+4</sub>.

204

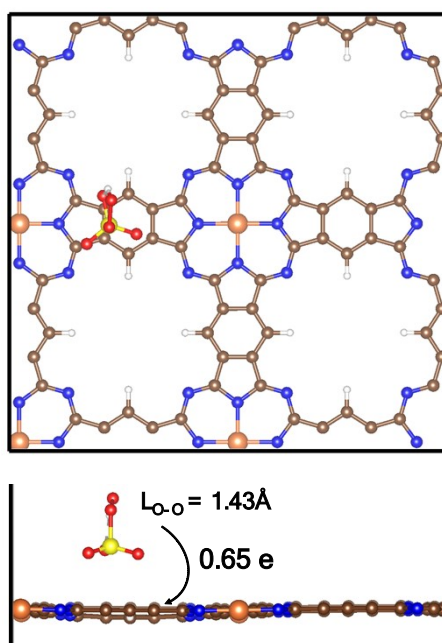

205

206 **Figure S24.** Top and side view of CPF-FeN<sub>4+4</sub> adsorbing PMS on C site.

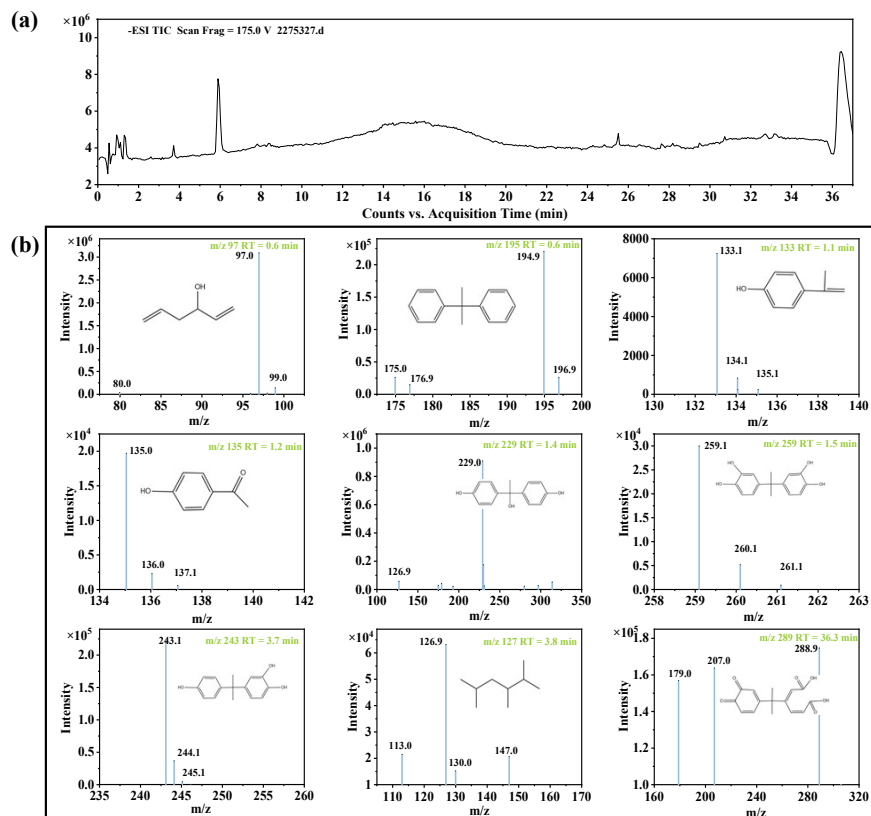

207

208 **Figure S25.** LC/MS chromatogram and mass spectra for BPA. (a) total ions  
 209 chromatogram (TIC) from LC-MS; (b) mass spectra of the main peaks. Routine  
 210 conditions: [BPA] = 20  $\mu$ M, [catalyst] = 0.10 g/L, [PMS] = 0.15 mM, temperature = 25  
 211  $^{\circ}$ C, without pH adjustment.

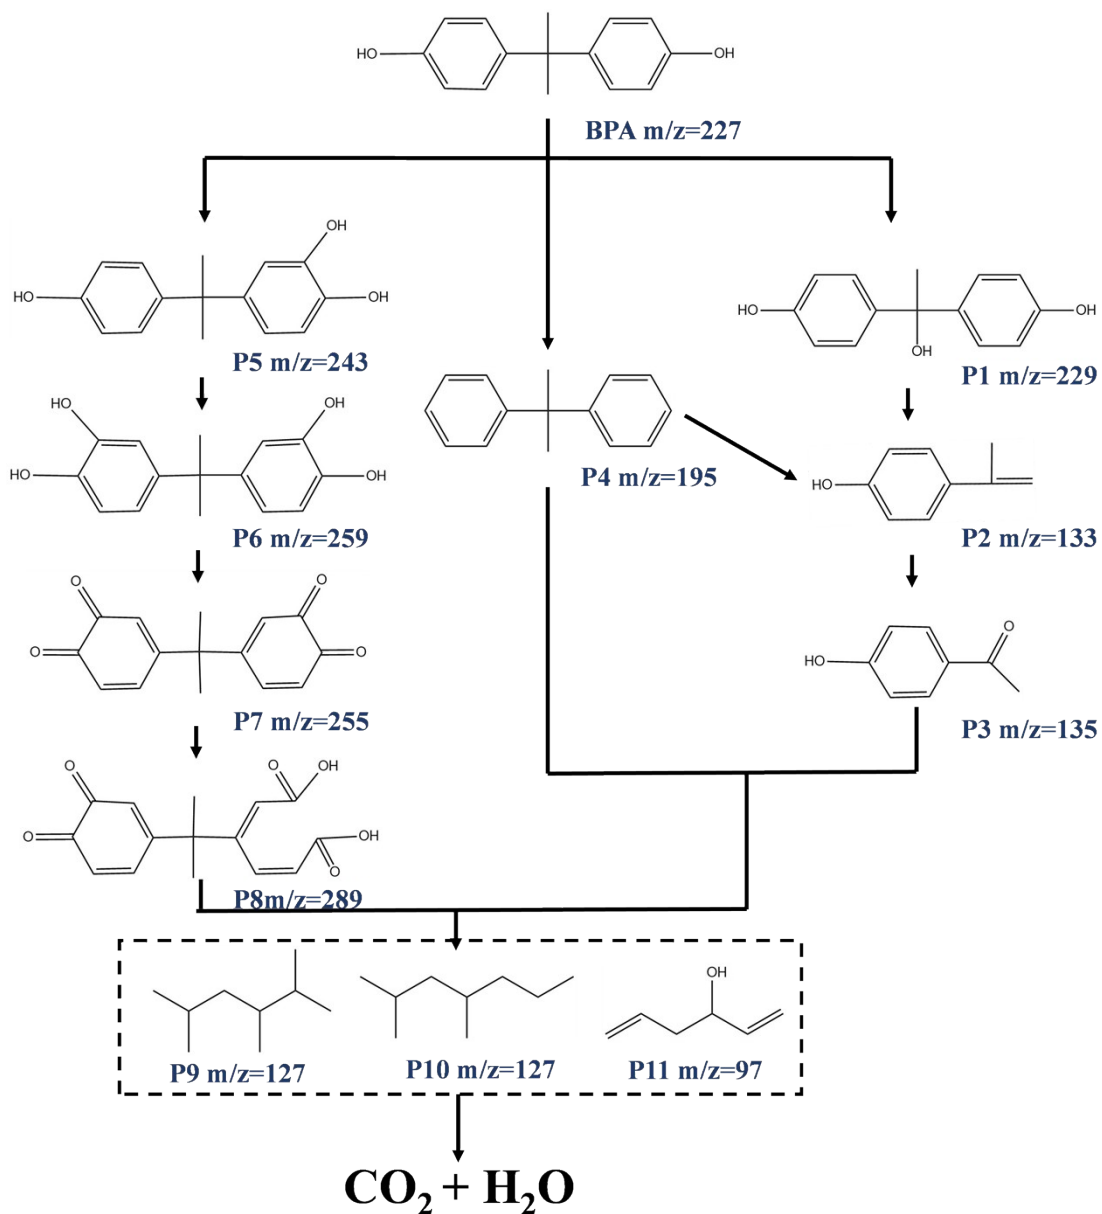

212

213 **Figure S26.** Proposed degradation pathway of BPA over CPF-FeN<sub>4+4</sub>/PMS system.

214 **References**

- 215 1. J. P. Perdew, K. Burke and M. Ernzerhof, *Phys. Rev. Lett.* 1996, **77**, 3865-3868.  
216 2. J. Hafner, *J. Comput. Chem.* 2008, **29**, 2044-2078.  
217 3. S. Wang and J. Wang, *Appl. Catal. B* 2023, **321**, 122051.  
218 4. K. Qian, H. Chen, W. Li, Z. Ao, Y. N. Wu and X. Guan, *Environ. Sci. Technol.*  
219 2021, **55**, 7034-7043.  
220 5. J. Miao, Y. Zhu, J. Lang, J. Zhang, S. Cheng, B. Zhou, L. Zhang, P. J. J. Alvarez  
221 and M. Long, *ACS Catal.* 2021, **11**, 9569-9577.  
222 6. J. Yang, P. Li, X. Duan, D. Zeng, Z. Ma, S. An, L. Dong, W. Cen and Y. He, *J.*  
223 *Hazard. Mater.* 2022, **430**, 128463.  
224 7. X. Mi, P. Wang, S. Xu, L. Su, H. Zhong, H. Wang, Y. Li and S. Zhan, *Angew.*  
225 *Chem. Int. Ed.* 2021, **60**, 4588-4593.  
226 8. J. He, Y. Wan and W. Zhou, *J. Hazard. Mater.* 2021, **405**, 124199.  
227 9. F. Chen, X.-L. Wu, L. Yang, C. Chen, H. Lin and J. Chen, *Chem. Eng. J.* 2020,  
228 **394**, 124904.  
229 10. F. Li, Z. Wan, D. Zheng, L. Zhang, W. Huang, F. Chen, J. Deng, Z. Qi, G. Li and  
230 F. Zhang, *Chem. Eng. J.* 2024, **482**, 149052.  
231 11. Z. Zhou, M. Li, C. Kuai, Y. Zhang, V. F. Smith, F. Lin, A. Aiello, D. P. Durkin,  
232 H. Chen and D. Shuai, *J. Hazard. Mater.* 2021, **418**, 126294.  
233 12. X. Zhou, M. K. Ke, G. X. Huang, C. Chen, W. Chen, K. Liang, Y. Qu, J. Yang,  
234 Y. Wang, F. Li, H. Q. Yu and Y. Wu, *Proc. Nat. Acad. Sci.* 2022, **119**,  
235 e2119492119.  
236 13. Q. Y. Wu, Z. W. Yang, Z. W. Wang and W. L. Wang, *Proc. Nat. Acad. Sci.* 2023,  
237 **120**, e2219923120.  
238 14. H. Q. Zhao, J. S. Song, P. Lu and Y. Mu, *Chem. Eng. J.* 2023, **456**, 141045.  
239 15. Z. Wang, E. Almatrafi, H. Wang, H. Qin, W. Wang, L. Du, S. Chen, G. Zeng  
240 and P. Xu, *Angew. Chem. Int. Ed.* 2022, **61**, e202202338.
